# Supplementary material
Source: PubMed Central journal article supplement (PMC3009799)
Supplement: 1012236107_sd01.pdf [file 1012236107_sd01.pdf]

1 10 20 30 40 50 60 70 80 90 100 110 120  
TEBBeta\_inj\_RNA  
1\_fig1\_lane3  
2\_fig1\_lane3  
3\_fig1\_lane3  
4\_fig1\_lane3  
5\_fig1\_lane3  
6\_fig1\_lane3  
7\_fig1\_lane3  
8\_fig1\_lane3  
9\_fig1\_lane3  
10\_fig1\_lane3  
11\_fig1\_lane3  
12\_fig1\_lane3  
13\_fig1\_lane3  
14\_fig1\_lane3  
15\_fig1\_lane3  
16\_fig1\_lane3  
17\_fig1\_lane3  
18\_fig1\_lane3  
19\_fig1\_lane3  
20\_fig1\_lane3  
21\_fig1\_lane3

130 140 150 160 170 180 190 200 210 220 230 240  
TEBBeta\_inj\_RNA  
1\_fig1\_lane3  
2\_fig1\_lane3  
3\_fig1\_lane3  
4\_fig1\_lane3  
5\_fig1\_lane3  
6\_fig1\_lane3  
7\_fig1\_lane3  
8\_fig1\_lane3  
9\_fig1\_lane3  
10\_fig1\_lane3  
11\_fig1\_lane3  
12\_fig1\_lane3  
13\_fig1\_lane3  
14\_fig1\_lane3  
15\_fig1\_lane3  
16\_fig1\_lane3  
17\_fig1\_lane3  
18\_fig1\_lane3  
19\_fig1\_lane3  
20\_fig1\_lane3  
21\_fig1\_lane3

250 260 270 280 290 300 310 320 330 340 350 360  
TEBBeta\_inj\_RNA  
1\_fig1\_lane3  
2\_fig1\_lane3  
3\_fig1\_lane3  
4\_fig1\_lane3  
5\_fig1\_lane3  
6\_fig1\_lane3  
7\_fig1\_lane3  
8\_fig1\_lane3  
9\_fig1\_lane3  
10\_fig1\_lane3  
11\_fig1\_lane3  
12\_fig1\_lane3  
13\_fig1\_lane3  
14\_fig1\_lane3  
15\_fig1\_lane3  
16\_fig1\_lane3  
17\_fig1\_lane3  
18\_fig1\_lane3  
19\_fig1\_lane3  
20\_fig1\_lane3  
21\_fig1\_lane3

370 380 390 400 410 420 430 440 450 460 470 480  
TEBBeta\_inj\_RNA  
1\_fig1\_lane3  
2\_fig1\_lane3  
3\_fig1\_lane3  
4\_fig1\_lane3  
5\_fig1\_lane3  
6\_fig1\_lane3  
7\_fig1\_lane3  
8\_fig1\_lane3  
9\_fig1\_lane3  
10\_fig1\_lane3  
11\_fig1\_lane3  
12\_fig1\_lane3  
13\_fig1\_lane3  
14\_fig1\_lane3  
15\_fig1\_lane3  
16\_fig1\_lane3  
17\_fig1\_lane3  
18\_fig1\_lane3  
19\_fig1\_lane3  
20\_fig1\_lane3  
21\_fig1\_lane3

490 500 510 520 530 540 550 560 570 580 590 600  
TEBBeta\_inj\_RNA  
1\_fig1\_lane3  
2\_fig1\_lane3  
3\_fig1\_lane3  
4\_fig1\_lane3  
5\_fig1\_lane3  
6\_fig1\_lane3  
7\_fig1\_lane3  
8\_fig1\_lane3  
9\_fig1\_lane3  
10\_fig1\_lane3  
11\_fig1\_lane3  
12\_fig1\_lane3  
13\_fig1\_lane3  
14\_fig1\_lane3  
15\_fig1\_lane3  
16\_fig1\_lane3  
17\_fig1\_lane3  
18\_fig1\_lane3  
19\_fig1\_lane3  
20\_fig1\_lane3  
21\_fig1\_lane3

610 620 630 640 650 660 670 680 690 700 710 720  
TEBBeta\_inj\_RNA  
1\_fig1\_lane3  
2\_fig1\_lane3  
3\_fig1\_lane3  
4\_fig1\_lane3  
5\_fig1\_lane3  
6\_fig1\_lane3  
7\_fig1\_lane3  
8\_fig1\_lane3  
9\_fig1\_lane3  
10\_fig1\_lane3  
11\_fig1\_lane3  
12\_fig1\_lane3  
13\_fig1\_lane3  
14\_fig1\_lane3  
15\_fig1\_lane3  
16\_fig1\_lane3  
17\_fig1\_lane3  
18\_fig1\_lane3  
19\_fig1\_lane3  
20\_fig1\_lane3  
21\_fig1\_lane3

730 740 750 760 770 780 790 800 810 820 830 840  
TEBBeta\_inj\_RNA  
1\_fig1\_lane3  
2\_fig1\_lane3  
3\_fig1\_lane3  
4\_fig1\_lane3  
5\_fig1\_lane3  
6\_fig1\_lane3  
7\_fig1\_lane3  
8\_fig1\_lane3  
9\_fig1\_lane3  
10\_fig1\_lane3  
11\_fig1\_lane3  
12\_fig1\_lane3  
13\_fig1\_lane3  
14\_fig1\_lane3  
15\_fig1\_lane3  
16\_fig1\_lane3  
17\_fig1\_lane3  
18\_fig1\_lane3  
19\_fig1\_lane3  
20\_fig1\_lane3  
21\_fig1\_lane3

850 860 870 880 890 900 910 920 930 932  
TEBBeta\_inj\_RNA  
1\_fig1\_lane3  
2\_fig1\_lane3  
3\_fig1\_lane3  
4\_fig1\_lane3  
5\_fig1\_lane3  
6\_fig1\_lane3  
7\_fig1\_lane3  
8\_fig1\_lane3  
9\_fig1\_lane3  
10\_fig1\_lane3  
11\_fig1\_lane3  
12\_fig1\_lane3  
13\_fig1\_lane3  
14\_fig1\_lane3  
15\_fig1\_lane3  
16\_fig1\_lane3  
17\_fig1\_lane3  
18\_fig1\_lane3  
19\_fig1\_lane3  
20\_fig1\_lane3  
21\_fig1\_lane3











Actin1\_inj\_DNA 1 10 20 30 40 50 60 70 80 90 100 110 120  
1\_fig2\_lane35 CCCC...  
2\_fig2\_lane35 CCCC...  
3\_fig2\_lane35 CCCC...  
4\_fig2\_lane35 CCCC...  
5\_fig2\_lane35 CCCC...  
6\_fig2\_lane35 CCCC...  
7\_fig2\_lane35 CCCC...  
8\_fig2\_lane35 CCCC...  
Actin1\_inj\_DNA 130 140 150 160 170 180 190 200 210 220 230 240  
1\_fig2\_lane35 TCAA...  
2\_fig2\_lane35 TCAA...  
3\_fig2\_lane35 TCAA...  
4\_fig2\_lane35 TCAA...  
5\_fig2\_lane35 TCAA...  
6\_fig2\_lane35 TCAA...  
7\_fig2\_lane35 TCAA...  
8\_fig2\_lane35 TCAA...  
Actin1\_inj\_DNA 250 260 270 280 290 300 310 320 330 340 350 360  
1\_fig2\_lane35 TCAG...  
2\_fig2\_lane35 TCAG...  
3\_fig2\_lane35 TCAG...  
4\_fig2\_lane35 TCAG...  
5\_fig2\_lane35 TCAG...  
6\_fig2\_lane35 TCAG...  
7\_fig2\_lane35 TCAG...  
8\_fig2\_lane35 TCAG...  
Actin1\_inj\_DNA 370 380 390 400 410 420 430 440 450 460 470 480  
1\_fig2\_lane35 CTCG...  
2\_fig2\_lane35 CTCG...  
3\_fig2\_lane35 CTCG...  
4\_fig2\_lane35 CTCG...  
5\_fig2\_lane35 CTCG...  
6\_fig2\_lane35 CTCG...  
7\_fig2\_lane35 CTCG...  
8\_fig2\_lane35 CTCG...  
Actin1\_inj\_DNA 490 500 510 520 530 540 550 560 570 580 590 600  
1\_fig2\_lane35 CTCAG...  
2\_fig2\_lane35 CTCAG...  
3\_fig2\_lane35 CTCAG...  
4\_fig2\_lane35 CTCAG...  
5\_fig2\_lane35 CTCAG...  
6\_fig2\_lane35 CTCAG...  
7\_fig2\_lane35 CTCAG...  
8\_fig2\_lane35 CTCAG...  
Actin1\_inj\_DNA 610 620 630 640 650 660 670 680 690 700 710 720  
1\_fig2\_lane35 GTTG...  
2\_fig2\_lane35 GTTG...  
3\_fig2\_lane35 GTTG...  
4\_fig2\_lane35 GTTG...  
5\_fig2\_lane35 GTTG...  
6\_fig2\_lane35 GTTG...  
7\_fig2\_lane35 GTTG...  
8\_fig2\_lane35 GTTG...  
Actin1\_inj\_DNA 730 740 750 760 770 780 790 800 810 820 830 840  
1\_fig2\_lane35 GCCG...  
2\_fig2\_lane35 GCCG...  
3\_fig2\_lane35 GCCG...  
4\_fig2\_lane35 GCCG...  
5\_fig2\_lane35 GCCG...  
6\_fig2\_lane35 GCCG...  
7\_fig2\_lane35 GCCG...  
8\_fig2\_lane35 GCCG...  
Actin1\_inj\_DNA 850 860 870 880 890 900 910 920 930 940 950 960  
1\_fig2\_lane35 GAAA...  
2\_fig2\_lane35 GAAA...  
3\_fig2\_lane35 GAAA...  
4\_fig2\_lane35 GAAA...  
5\_fig2\_lane35 GAAA...  
6\_fig2\_lane35 GAAA...  
7\_fig2\_lane35 GAAA...  
8\_fig2\_lane35 GAAA...  
Actin1\_inj\_DNA 970 980 990 1,000 1,010 1,020 1,030 1,040 1,050 1,060 1,070 1,080  
1\_fig2\_lane35 AGAT...  
2\_fig2\_lane35 AGAT...  
3\_fig2\_lane35 AGAT...  
4\_fig2\_lane35 AGAT...  
5\_fig2\_lane35 AGAT...  
6\_fig2\_lane35 AGAT...  
7\_fig2\_lane35 AGAT...  
8\_fig2\_lane35 AGAT...  
Actin1\_inj\_DNA 1,090 1,100 1,110 1,120 1,130 1,140 1,150 1,160 1,170 1,180 1,190 1,200  
1\_fig2\_lane35 CTCT...  
2\_fig2\_lane35 CTCT...  
3\_fig2\_lane35 CTCT...  
4\_fig2\_lane35 CTCT...  
5\_fig2\_lane35 CTCT...  
6\_fig2\_lane35 CTCT...  
7\_fig2\_lane35 CTCT...  
8\_fig2\_lane35 CTCT...  
Actin1\_inj\_DNA 1,210 1,220 1,230 1,240 1,250 1,260 1,270 1,280 1,290 1,300 1,310 1,320  
1\_fig2\_lane35 CCAG...  
2\_fig2\_lane35 CCAG...  
3\_fig2\_lane35 CCAG...  
4\_fig2\_lane35 CCAG...  
5\_fig2\_lane35 CCAG...  
6\_fig2\_lane35 CCAG...  
7\_fig2\_lane35 CCAG...  
8\_fig2\_lane35 CCAG...  
Actin1\_inj\_DNA 1,330 1,340 1,350 1,360 1,370 1,380 1,390 1,400 1,410 1,420 1,430 1,440  
1\_fig2\_lane35 AAA...  
2\_fig2\_lane35 AAA...  
3\_fig2\_lane35 AAA...  
4\_fig2\_lane35 AAA...  
5\_fig2\_lane35 AAA...  
6\_fig2\_lane35 AAA...  
7\_fig2\_lane35 AAA...  
8\_fig2\_lane35 AAA...  
Actin1\_inj\_DNA 1,450 1,460 1,470 1,480 1,490 1,500 1,510 1,520 1,530 1,540 1,550  
1\_fig2\_lane35 GGT...  
2\_fig2\_lane35 GGT...  
3\_fig2\_lane35 GGT...  
4\_fig2\_lane35 GGT...  
5\_fig2\_lane35 GGT...  
6\_fig2\_lane35 GGT...  
7\_fig2\_lane35 GGT...  
8\_fig2\_lane35 GGT...
